# Supplementary material
Source: PubMed Central journal article supplement (PMC2832945)
Supplement: supp_M109.092759_jbc.M109.092759-1.pdf [file supp_M109.092759_jbc.M109.092759-1.pdf]

# Supplemental Data

## Figure S1

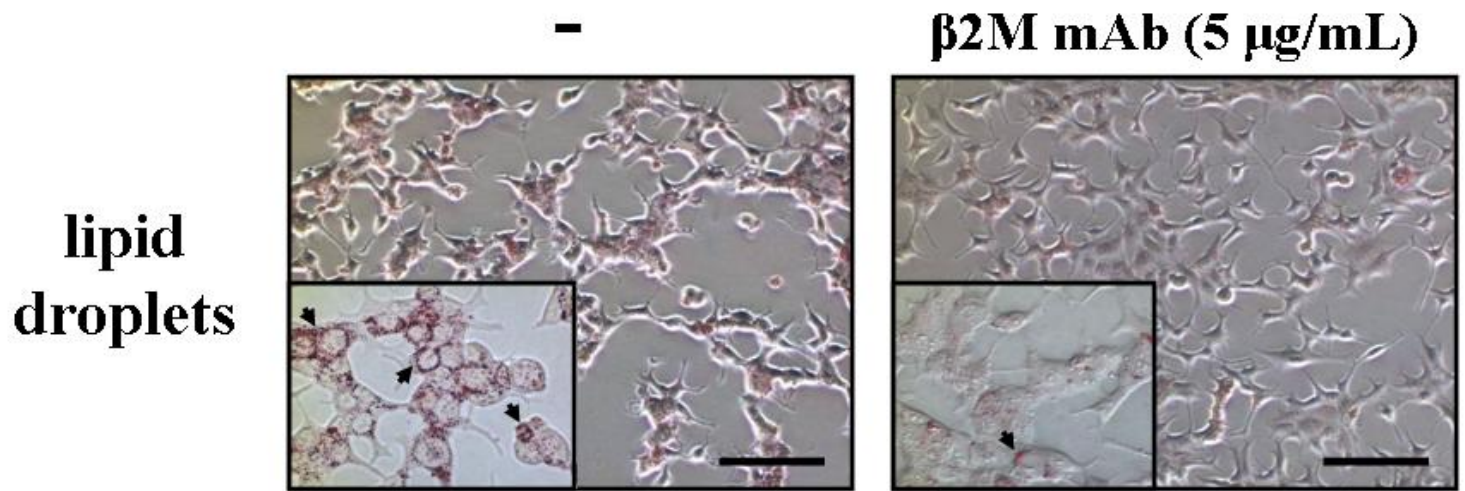

### **Supplementary Experimental Procedures**

*Oil Red O staining*— Lipid droplets were assayed by Oil Red O staining (39). Briefly, cells were washed gently with PBS twice, fixed with 3.7% fresh formaldehyde at least 1 h at room temperature. Subsequently, cells were stained by filtered Oil Red O solution for 10 min. After Oil Red O staining, staining solution was removed and washed with water for four times. Images were examined and recorded by a phase contrast microscope.

### **Supplementary Figure Legends**

**FIGURE S1.  $\beta$ 2M mAb inhibited lipid accumulation in prostate cancer cells.**  $\beta$ 2M mAb (5  $\mu$ g/mL, 24 h treatment) greatly decreased accumulation of lipid droplets (arrowheads indicated small red dots) in LNCaP cells. Scale bars = 150  $\mu$ m.
